## Identification and characterization of a gene encoding NADP(H)-dependent bile acid 12 $\beta$ -hydroxysteroid dehydrogenase from *Clostridium paraputrificum* ATCC 25780

Heidi Doden<sup>a,b</sup>, João M.P. Alves<sup>c</sup>, Jason M. Ridlon<sup>a,b,d,e,f</sup>

<sup>a</sup>Microbiome Metabolic Engineering Theme, Carl R. Woese Institute for Genomic Biology, University of Illinois at Urbana Champaign, Urbana IL, USA

<sup>b</sup>Department of Animal Sciences, University of Illinois at Urbana Champaign, Urbana IL, USA

<sup>c</sup>Department of Parasitology, Institute of Biomedical Sciences, University of São Paulo, São Paulo, Brazil

<sup>d</sup>Division of Nutritional Sciences, University of Illinois at Urbana Champaign, Urbana IL, USA

<sup>e</sup>Cancer Center of Illinois, Urbana, IL, USA

<sup>f</sup>Department of Microbiology and Immunology, Virginia Commonwealth University, Richmond VA, USA

### ABSTRACT

Bile acids are detergent molecules that solubilize dietary lipids and lipid-soluble vitamins. Humans synthesize bile acids with  $\alpha$ -orientation hydroxyl groups which can be biotransformed by gut microbiota to toxic, hydrophobic bile acids, such as deoxycholic acid (DCA). Gut microbiota are also capable of converting hydroxyl groups from the  $\alpha$ -orientation through an oxo-intermediate to the  $\beta$ -orientation, resulting in more hydrophilic and less toxic bile acids. This interconversion is catalyzed by regio- (C-3 vs. C-7) and stereospecific ( $\alpha$  vs.  $\beta$ ) hydroxysteroid dehydrogenases (HSDHs). Recently, multiple human gut clostridia have been reported to encode 12 $\alpha$ -HSDH, which interconverts DCA and 12-oxolithocholic acid (12-oxoLCA). Bile acid 12 $\beta$ -HSDH activity completes the epimerization of DCA by converting 12-oxoLCA to the 12 $\beta$ -bile acid known as epiDCA. While 12 $\beta$ -HSDH activity has been shown in cell extracts of *Clostridium paraputrificum*, the gene has not yet been reported. In order to identify the first gene encoding this activity, 6

candidate oxidoreductase genes from *C. parapatricum* ATCC 25780 were cloned, overexpressed, purified, and screened for activity with 12-oxoLCA and epiDCA. LC-MS analysis was performed on reaction products from the enzyme encoded by DR024\_RS09610, confirming the first 12 $\beta$ -HSDH gene discovered. The enzyme was more specific for bile acids lacking a 7-hydroxyl group than cholic acid derivatives containing a 7-hydroxyl. Phylogenetic analysis revealed previously unknown diversity for bile acid 12 $\beta$ -HSDH by experimentally validating two additional 12 $\beta$ -HSDHs within the tree from *Eisenbergiella* sp. OF01-20 and *Olsenella* sp. GAM18.

## INTRODUCTION

The human liver produces all 14 enzymes necessary to convert cholesterol into the dihydroxy bile acid chenodeoxycholic acid (3 $\alpha$ ,7 $\alpha$ -dihydroxy-5 $\beta$ -cholan-24-oic acid; CDCA) and the trihydroxy bile acid cholic acid (3 $\alpha$ ,7 $\alpha$ ,12 $\alpha$ -trihydroxy-5 $\beta$ -cholan-24-oic acid; CA) (1). These bile acids are conjugated to taurine or glycine in the liver helping to lower the pK<sub>a</sub> and maintain solubility, impermeability to cell membranes, and lower the critical micellar concentration, allowing for efficient emulsification of dietary lipids and lipid-soluble vitamins (2). Bile acids are effective detergents owing to the  $\alpha$ -orientation of the hydroxyl groups which produce a hydrophilic-face above the plane of the cyclopentanephenanthrene steroid nucleus, and a hydrophobic-face below the plane of the hydrocarbon rings (1). Conjugated bile acids emulsify lipids throughout the duodenum, jejunum, and ileum. Once the terminal ileum is reached, high affinity transporters (intestinal bile acid transporter, IBAT) actively transport both conjugated and unconjugated bile acids from the intestinal lumen into ileocytes where they are bound to ileal bile acid binding protein (IBABP) and exported across the basolateral membrane into portal circulation and returned to the liver (3). This process of recycling of bile acids is known as the enterohepatic circulation (EHC), responsible for recirculating the ~2 g bile acid pool 8-10 times daily. While ~95% efficient, roughly 600-800 mg bile acids escape active transport and enter the large intestine (2).

Anaerobic bacteria adapted to inhabiting the large intestine have evolved enzymes to modify the structure of host bile acids (2). Conjugated bile acids are hydrolyzed, releasing the amino acids, by bile salt hydrolases (BSH) in diverse gut bacteria representing the major phyla including Bacteroidetes, Firmicutes, and Actinobacteria as well as the domain Archaea (4). By contrast, the unconjugated primary bile acids CA and CDCA are 7 $\alpha$ -dehydroxylated by a select few species of gram-positive Firmicutes mostly in the genus *Clostridium*, forming deoxycholic acid (3 $\alpha$ ,12 $\alpha$ -dihydroxy-5 $\beta$ -cholan-24-oic acid; DCA) and lithocholic acid (3 $\alpha$ -hydroxy-5 $\beta$ -cholan-24-oic acid; LCA), respectively (1, 5). The secondary bile acids DCA and LCA have increased hydrophobicity relative to their primary counterparts, which is associated with elevated toxicity (6). DCA and LCA have been causally linked to cancers of the colon (7), liver (8), and esophagus (9). Importantly, gut microbiota can produce less toxic oxo-bile acids and  $\beta$ -hydroxy bile acids as well (6).

Bile acid 3 $\alpha$ -, 7 $\alpha$ -, and 12 $\alpha$ -hydroxyl groups can be reversibly oxidized and epimerized to the  $\beta$ -orientation by pyridine nucleotide-dependent hydroxysteroid dehydrogenases (HSDHs) distributed across the major phyla including Firmicutes, Bacteroidetes, Actinobacteria, Proteobacteria, as well as methanogenic archaea (1, 10). HSDH enzymes that recognize bile acids are regio- (C-3 vs. C-7) and stereospecific ( $\alpha$  vs.  $\beta$ ) for hydroxyl groups decorating the steroid nucleus. Thus, bile acid 12 $\alpha$ -HSDH reversibly converts the C-12 position of bile acids from the  $\alpha$ -orientation, such as on DCA, to 12-oxo bile acids, such as 12-oxolithocholic acid (12-oxoLCA) (11–14). Bile acid 12 $\beta$ -HSDH completes the epimerization by interconverting 12-oxo bile acids to the 12 $\beta$ -configuration, forming epi-bile acids (**Fig. 1A**). We recently identified and characterized NAD(H)- and NADP(H)-dependent 12 $\alpha$ -HSDHs from *Eggerthella* sp. CAG:298 (15), *Clostridium scindens*, *C. hylemonae*, and *Peptacetobacter hiranonis* (formerly *Clostridium hiranonis*) (10). In addition to these recently reported 12 $\alpha$ -HSDHs, genes encoding 3 $\alpha$ -, 3 $\beta$ -, 7 $\alpha$ -, and 7 $\beta$ -HSDH have also been identified and their gene products characterized (5). However, a gene encoding 12 $\beta$ -HSDH has not been reported to date.

The first indication that gut bacteria may encode 12 $\beta$ -HSDH was suggested by the detection of 12 $\beta$ -hydroxy bile acids in human feces (16–18). Edenharder and Schneider (1985) reported 12 $\beta$ -dehydrogenation of bile acids by *Clostridium paraputrificum*, and epimerization of DCA by co-culture with *E. lenta* and *C. paraputrificum* (19). Thereafter, Edenharder and Pfützner (1988) characterized crude NADP(H)-dependent 12 $\beta$ -HSDH activity from *C. paraputrificum* D 762-06 (20). However, little is known about the potential diversity of gut bacteria capable of forming 12 $\beta$ -hydroxy bile acids that molecular analysis is predicted to yield. Here, we report the identification of a gene encoding NADP(H)-dependent 12 $\beta$ -HSDH from *C. paraputrificum* ATCC 25780 and characterization of the recombinant gene products purified after heterologous expression in *E. coli* from *C. paraputrificum*. We also identify novel taxa encoding bile acid 12 $\beta$ -HSDH by phylogenetic analysis, confirmed by a synthetic biology approach.

## MATERIALS AND METHODS

**Bacterial strains and chemicals.** *Clostridium paraputrificum* ATCC 25780 and *Clostridium scindens* ATCC 35704 were obtained from 80°C glycerol stocks from culture collections at the University of Illinois at Urbana-Champaign (UIUC). *E. coli* DH5 $\alpha$  (Turbo) competent cells from New England Biolabs (Ipswich, MA) and NovaBlue GigaSingles™ Competent cells from Novagen (San Diego, CA) were used for cloning, and *E. coli* BL21-Codon-Plus (DE3) RIPL was purchased from Stratagene (La Jolla, CA) and used for protein overexpression. 5 $\beta$ -Cholanic acid-3 $\alpha$ , 7 $\alpha$ , 12 $\alpha$ -triol (CA), 5 $\beta$ -cholanic acid-3 $\alpha$ ,12 $\alpha$ -diol (DCA), and 5 $\beta$ -cholanic acid-3 $\alpha$ ,7 $\alpha$ -diol (CDCA) were purchased from Sigma-Aldrich (St. Louis, MO, USA). Authentic 5 $\beta$ -cholanic acid-3 $\alpha$ ,12 $\beta$ -diol (epiDCA) and 5 $\beta$ -cholanic acid-3 $\alpha$ ,7 $\alpha$ ,12 $\beta$ -diol (epiCA) were generously obtained from Lee R. Hagey (University of California, San Diego). Other bile acids were purchased from Steraloids (Newport, RI). All other reagents were of the highest possible purity and were purchased from Fisher Scientific (Pittsburgh, PA).

**Whole cell bile acid conversion assay.** *C. paraputrificum* ATCC 25780 and *C. scindens* ATCC 35704 were cultivated in anaerobic brain heart infusion (BHI) broth for 24 hrs. 2 mL anaerobic BHI was inoculated with 1:10 dilution of either organism along with 50  $\mu$ M bile acid substrate and incubated at 37°C for 24 hours. The bacterial cultures were centrifuged at 10,000  $\times$  g for 5 min to remove bacterial cells and the conditioned media was adjusted to pH 3.0. Solid phase extraction was used to extract bile acid products from bacterial culture. Waters tC18 vacuum cartridges (3 cc) (Milford, MA) were preconditioned with 6 mL 100% hexanes, 3 mL 100% acetone, 6 mL 100% methanol, and 6 mL water, pH 3.0. The conditioned media was added to the cartridges and vacuum was applied to pull media through dropwise. Cartridges were washed with 6 mL water (pH 3.0) and 40% methanol. Bile acid products were eluted with 3 mL 100% methanol. Eluates were then evaporated under nitrogen gas and the residues dissolved in 200  $\mu$ L 100% methanol for LC-MS analysis.

**Liquid chromatography-mass spectrometry.** LC-MS analysis for all samples was performed using a Waters Acquity UPLC system coupled to a Waters SYNAPT G2-Si ESI mass spectrometer (Milford, MA). LC was performed with a Waters Acquity UPLC HSS T3 C18 column (1.8 $\mu$ m particle size, 2.1mm x 100mm) at a column temperature of 40°C. Samples were injected at 1  $\mu$ L. Mobile phase A was water and B was acetonitrile. The mobile phase gradient was as follows: 0 min 100% mobile phase A, 0.5 min 100% A, 25 min 0% A, 25.1 min 100% A, 28 min 100% A. The flow rate was 0.5 mL/min. MS was carried out in negative ion mode with a desolvation temperature of 300°C and desolvation gas flow of 700 L/hr. The capillary voltage was 3,000 V. Source temperature was 100°C and cone voltage was 30 V. Chromatographs and mass spectrometry data were analyzed using Waters MassLynx software (Milford, MA).

**Isolation of genomic DNA.** Genomic DNA was extracted from *C. paraputrificum* ATCC 25780 using the Fast DNA isolation kit from Mo-Bio (Carlsbad, CA) according to the manufacturer's protocol for polymerase chain reaction and molecular cloning applications.

**Heterologous expression of potential 12 $\beta$ -HSDH proteins.** The pET-28a(+) and pET-46 Ek/LIC vectors were obtained from Novagen (San Diego, CA). Restriction enzymes were purchased from NEB (Ipswich, MA). Inserts were generated by PCR amplification with cloning primers from Integrative DNA Technologies, Inc (Coralville, IA, USA) of *C. paraputrificum* ATCC 25780 genomic DNA or genes synthesized in *E. coli* K12 codon usage (IDT, Coralville, IA, USA). Cloning primers and genes created by gene synthesis are listed in **Table S1**. Inserts were amplified using the Phusion High Fidelity Polymerase (Stratagene, La Jolla, CA, USA) and cloned into pET-28a(+) after insert and vector were double digested with the appropriate restriction endonuclease and treated with DNA Ligase, or annealed into pET-46 Ek/LIC after treatment with T4 DNA Polymerase. Recombinant plasmids were transformed via heat shock method, plated, and grown overnight at 37°C on lysogeny broth (LB) agar plates supplemented with antibiotic (50  $\mu$ g/mL kanamycin or 100  $\mu$ g/mL ampicillin). Vectors were either transformed into chemically competent *E. coli* DH5 $\alpha$  cells and grown with kanamycin (pET-28a(+)) or transformed into NovaBlue Giga Singles™ Competent cells and grown with ampicillin (pET-46 Ek/LIC). A single colony from each transformation was inoculated into LB medium (5 mL) containing the corresponding antibiotic and grown to saturation. Recombinant plasmids were extracted from cell pellets using the QIAprep Spin Miniprep kit (Qiagen, Valencia, CA, USA). The sequence of the inserts was confirmed by Sanger sequencing (W. M. Keck Center for Comparative and Functional Genomics at the University of Illinois at Urbana-Champaign).

For protein expression, the extracted recombinant plasmids were transformed into *E. coli* BL-21 CodonPlus (DE3) RIPL chemically competent cells by heat shock method and cultured overnight at 37°C on LB agar plates supplemented with ampicillin or kanamycin (100  $\mu$ g/ml; 50

$\mu\text{g/mL}$ ) and chloramphenicol (50  $\mu\text{g/ml}$ ). Selected colonies were inoculated into 10 mL of LB medium supplemented with antibiotics and grown at 37°C for 6 hours with vigorous aeration. The pre-cultures were added to fresh LB medium (1 L), supplemented with antibiotics, and aerated at 37°C until reaching an  $\text{OD}_{600\text{nm}}$  of 0.3. IPTG was added to each culture at a final concentration of 0.1 mM to induce and the temperature was decreased to 16°C for a 16 hour incubation. Cells were pelleted and resuspended in binding buffer (20 mM Tris-HCl, 300 mM NaCl, 10 mM 2-mercaptoethanol, pH 7.9). The cells were subjected to five passages through an EmulsiFlex C-3 cell homogenizer (Avestin, Ottawa, Canada), and the cell debris was separated by centrifugation.

The recombinant protein in the soluble fraction was then purified using TALON® Metal Affinity Resin (Clontech Laboratories, Mountain View, CA) per the manufacturer's protocol. The recombinant protein was eluted using an elution buffer composed of 20 mM Tris-HCl, 300 mM NaCl, 10 mM 2-mercaptoethanol, and 250 mM imidazole at pH 7.9. The resulting purified protein was analyzed using sodium dodecyl sulfate-polyacrylamide gel electrophoresis (SDS-PAGE). The observed subunit mass for each was calculated by migration distance of purified protein to standard proteins in ImageJ (<https://imagej.nih.gov/ij/docs/faqs.html>). TMHMM v. 2.0 was used to predict transmembrane helices (21).

**Enzyme Assays.** Pure recombinant 12 $\beta$ -HSDH reaction mixtures were made using 50  $\mu\text{M}$  substrate, 150  $\mu\text{M}$  cofactor and 10 nM enzyme in 150 mM NaCl, 50 mM sodium phosphate buffer at the pH optima 7.0 or 7.5. Reactions were monitored by spectrophotometric assay measuring the oxidation or reduction of NADP(H) aerobically at 340 nm ( $6,220 \text{ M}^{-1}\cdot\text{cm}^{-1}$ ) continuously for 1.5 min on a NanoDrop 2000c UV-Vis spectrophotometer (Fisher Scientific, Pittsburgh, PA) using a 10 mm quartz cuvette (Starna Cells, Atascadero, CA). Additional reactions were incubated overnight at room temperature and extracted by vortexing with two volumes ethyl acetate twice. The organic layer was recovered and evaporated under nitrogen gas. The products were

dissolved in 50  $\mu$ L methanol and LC-MS was performed as described above or used for thin layer chromatography.

The buffers for investigation of the optimal pH of recombinant 12 $\beta$ -HSDH contained 150 mM NaCl and one of the following buffering agents: 50 mM sodium acetate (pH 6.0), 50 mM sodium phosphate (pH 6.5 to 7.5), and 50 mM Tris-Cl (pH 8.0). Substrate specificity was performed according to the above reaction conditions at the optimal pH.

**Thin layer chromatography.** Reaction mixtures were made using 50  $\mu$ M substrate, 150  $\mu$ M cofactor and 10 nM enzyme in 150 mM NaCl, 50 mM sodium phosphate buffer at pH 7.0. Reactions were incubated overnight at room temperature and extracted by vortexing with two volumes ethyl acetate twice. The organic layer was recovered and evaporated under nitrogen gas. The products were dissolved in 50  $\mu$ L methanol and spotted on a TLC plate (silica gel IB2-F flexible TLC sheet, 20 x 20 cm, 250  $\mu$ m analytical layer; J. T. Baker, Avantor Performance Materials, LLC, PA, USA). The steroids were separated with a 70:20:2 toluene–1,4-dioxane–acetic acid mobile phase and visualized using a 10% phosphomolybdic acid in ethanol spray and heating for 15 min at 100°C (22).

**Native molecular weight determination.** Size-exclusion chromatography was performed using a Superose 6 10/300 GL analytical column (GE Healthcare, Piscataway, NJ) connected to an ÄKTExpress chromatography system (GE Healthcare, Piscataway, NJ) at 4°C. The column was equilibrated with 50 mM Tris-Cl and 150 mM NaCl at a pH of 7.5. The purified protein was loaded onto the analytical column at a concentration of 10 mg/mL and eluted at a flow rate of 0.3 ml/min. The native molecular mass of the 12 $\beta$ -HSDH was determined by comparing its elution volume to that of Gel Filtration Standard proteins (Bio-Rad, Hercules, CA): thyroglobulin,  $\gamma$ -globulin, ovalbumin, myoglobin, vitamin B<sub>12</sub>.



**Phylogenetic Analysis.** The sequence of the *C. paraputrificum* 12 $\beta$ -HSDH protein (accession number WP\_027099077.1) was used as query for a similarity search against the NCBI non-redundant protein database by BLASTP (23), with a maximum E-value threshold of 1e-10 and a limit of 5,000 results. Retrieved sequences were aligned with Muscle v. 3.8.1551 (24) and analyzed by maximum likelihood with RAxML v. 8.2.11 (25). Selection of the best-fitting amino acid substitution model and number of bootstrap pseudoreplicates were performed automatically, and substitution rate heterogeneity was modeled with gamma distributed rate categories. The resulting phylogenetic tree was formatted by Dendroscope v. 3.5.10 (26) and further cosmetic modifications were performed with the vector editor Inkscape, v. 0.92.4 (<https://inkscape.org>).

For closer analysis of the phylogenetic affiliation of the *C. paraputrificum* 12 $\beta$ -HSDH, sequences from the well-supported subtree where this sequence is located in the 5,000-sequence tree, plus an outgroup, were reanalyzed for confirming the relative placement of all sequences nearest to the *C. paraputrificum* 12 $\beta$ -HSDH. The methods used were the same as described above for the full tree.

A maximum-likelihood tree of representative HSDH sequences was inferred by selecting sequences from each HSDH subfamily, based on the tree from Mythen et al. (2018), with the addition of eukaryotic, archaeal, and other bacterial sequences deposited in the public databases. Phylogenetic inference methods were the same as described above.

## RESULTS

### ***C. paraputrificum* ATCC 25780 possesses bile acid 12 $\beta$ -HSDH activity**

We first investigated the bile acid metabolizing capability of *C. paraputrificum* ATCC 25780 due to previous reports of bile acid 12 $\beta$ -HSDH activity in *C. paraputrificum* strains (20). The 12-epimerization pathway of DCA involves the reversible conversion of DCA (3 $\alpha$ ,12 $\alpha$ ) to 12-oxoLCA (3 $\alpha$ ,12-oxo) through the action of 12 $\alpha$ -HSDH and 12-oxoLCA to epiDCA (3 $\alpha$ ,12 $\beta$ ) by 12 $\beta$ -HSDH (**Fig. 1A**). *C. paraputrificum* ATCC 25780 was incubated with two potential substrates of 12 $\beta$ -

HSDH, 12-oxoLCA and epiDCA, along with DCA as a control. In order to contrast the product formed by bile acid 12 $\beta$ -HSDH with that formed by bile acid 12 $\alpha$ -HSDH activity, *Clostridium scindens* ATCC 35704, which is known to express 12 $\alpha$ -HSDH, was incubated with the same substrates. When 12-oxoLCA was added to *C. paraputrificum* ATCC 25780 cells, the primary product eluted at 13.97 min with 391.28 m/z in negative ion mode (**Fig. 1B**). This is consistent with the elution time of epiDCA standard and its 392.57 amu formula weight. With epiDCA as substrate, the culture produced a major peak of 391.28 at 13.96 min and a minor peak of 389.27 m/z at 14.34 min, which suggests epiDCA was not converted in large quantities to 12-oxoLCA (390.56 amu). *C. paraputrificum* incubation with DCA did not result in detectable formation of 12-oxoLCA or epiDCA products. Taken together, these data demonstrate *C. paraputrificum* ATCC 25780 has bile acid 12 $\beta$ -HSDH activity, but not bile acid 12 $\alpha$ -HSDH. *C. scindens* ATCC 35704 incubation with 12-oxoLCA resulted in a main product (15.57 min and 391.28 m/z) consistent with DCA (392.57 amu), demonstrating bile acid 12 $\alpha$ -HSDH activity. Introduction of epiDCA as a substrate did not result in an oxidized product. In addition, reaction with DCA resulted in a peak at 15.57 min and 391.28 m/z along with a peak agreeing with 12-oxoLCA at 14.34 min and 389.27 m/z.

### **Identification of a gene encoding bile acid Cp12 $\beta$ -HSDH**

After bile acid 12 $\beta$ -HSDH activity was confirmed in *C. paraputrificum* ATCC 25780, its genome was searched for proteins annotated as oxidoreductases within the NCBI database. HSDHs are NAD(P)-dependent and often members of the large and diverse SDR (short-chain dehydrogenase/reductase) family (27). Five SDR family oxidoreductase proteins and one aldo/keto reductase were identified as 12 $\beta$ -HSDH candidates in the *C. paraputrificum* ATCC 25780 genome and pursued for further study. These six genes were amplified from genomic DNA of *C. paraputrificum* ATCC 25780, cloned into the pET-28a(+) vector, and overexpressed in *E.*

*coli* (**Table S1**). The N-terminal His<sub>6</sub>-tagged recombinant proteins were purified by metal-affinity chromatography and resolved by SDS-PAGE (**Fig. 2A**).

Two out of the six recombinant proteins (WP\_027096909.1, WP\_027099631.1) were not soluble and bands at the expected molecular masses were apparent in the membrane fraction by SDS-PAGE. These proteins were not explored further. The other four 12 $\beta$ -HSDH candidates (WP\_027099077.1, WP\_027098355.1, WP\_027097937.1, WP\_027098604.1) were soluble and visualized by SDS-PAGE. The four soluble recombinant proteins were then screened for pyridine nucleotide-dependent bile acid 12 $\beta$ -HSDH activity by TLC. Screening reactions were prepared with 12-oxoLCA and NADPH, or epiDCA and NADP<sup>+</sup> in pH 7.0 phosphate buffer.

Only WP\_027099077.1 exhibited 12 $\beta$ -HSDH activity by TLC and spectrophotometric assay, which was also confirmed by LC-MS (**Fig. 2B**). Reaction products of WP\_027099077.1 with 12-oxoLCA and NADPH, epiDCA and NADP<sup>+</sup>, DCA and NADP<sup>+</sup>, and no substrate control were subjected to LC-MS. In the presence of WP\_027099077.1 and pyridine nucleotide, 12-oxoLCA was almost completely reduced (2 hydrogen addition) to a product that eluted at 13.12 min with 391.28 m/z in negative ion mode. This is consistent with the 392.57 amu formula weight and elution time for epiDCA based on the substrate standard. Additionally, epiDCA was oxidized to a product with an elution time of 13.40 min at 389.27 m/z, agreeing with the formula weight of 12-oxoLCA at 390.56 amu. DCA (392.57 amu) was not converted by WP\_027099077.1 because the peak matched the DCA standard at 14.60 min and 391.29 m/z. The interconversion of 12-oxoLCA and epiDCA, but no activity with DCA indicates stereospecificity for the 12 $\beta$ -hydroxy position. Thus, DR024\_RS09610 has been identified as the first gene expressing bile acid 12 $\beta$ -HSDH (WP\_027099077.1).

Recombinant *C. parapatrificum* WP\_027099077.1, hereafter referred to as Cp12 $\beta$ -HSDH, had a theoretical subunit molecular mass of 27.4 kDa. The observed subunit molecular mass was 26.4  $\pm$  0.5 kDa on SDS-PAGE, calculated from three independent protein gels. WP\_027099077.1 is predicted to be a cytosolic protein that is not membrane-associated by TMHMM v. 2.0 (21).

## Biochemical characterization of recombinant Cp12 $\beta$ -HSDH

The approximate native molecular mass of Cp12 $\beta$ -HSDH was determined by size-exclusion chromatography. Cp12 $\beta$ -HSDH exhibited an elution volume of  $15.04 \pm 0.02$  mL, corresponding to a  $54.67 \pm 0.79$  kDa molecular mass relative to protein standards (**Fig. 3A**). The size-exclusion data along with the theoretical subunit molecular mass of 27.4 kDa suggests Cp12 $\beta$ -HSDH assembles a homodimeric quaternary structure in solution. In order to optimize the enzymatic activity of Cp12 $\beta$ -HSDH, the conversion of pyridine nucleotides at 340 nm was measured in buffers between pH 6.0 and 8.0 by spectrophotometric assay (**Fig. 3B**). The optimum pH for Cp12 $\beta$ -HSDH in the oxidative direction, with epiDCA as the substrate and NADP<sup>+</sup> as cosubstrate, was pH 7.5. In the reductive direction where 12-oxoLCA was the substrate and NADPH the co-substrate, the optimum pH was 7.0.

Pyridine nucleotide cofactor and bile acid substrate-specificity of Cp12 $\beta$ -HSDH were determined by relative activity compared to either 12-oxoLCA or epiDCA through spectrophotometric assay (**Table 2**). NAD(H) was not a cosubstrate for Cp12 $\beta$ -HSDH. DCA (3 $\alpha$ ,12 $\alpha$ ) as well as CA (3 $\alpha$ ,7 $\alpha$ ,12 $\alpha$ ) were not substrates, which is expected because they are 12 $\alpha$ -hydroxy bile acids not 12 $\beta$ -hydroxy bile acids. CDCA (chenodeoxycholic acid; 3 $\alpha$ ,7 $\alpha$ ) lacks a 12-hydroxyl group, and as expected, was not a substrate. The CA derivatives 12-oxoCDCA (3 $\alpha$ ,7 $\alpha$ ,12-oxo) and epiCA (3 $\alpha$ ,7 $\alpha$ ,12 $\beta$ ) had ~12% and 27% activity, respectively, relative to bile acids lacking a 7 $\alpha$ -hydroxyl group. The activity of 3,12-dioxoLCA was ~19% compared to 12-oxoLCA. Altogether, the results suggest Cp12 $\beta$ -HSDH is more specific for NADP(H) over NAD(H) and favors 12-oxoLCA and epiDCA over their 7 $\alpha$ -hydroxyl counterparts.

## Phylogenetic analysis of Cp12 $\beta$ -HSDH

The Cp12 $\beta$ -HSDH sequence from *C. parapatrificum* ATCC 25780 (WP\_027099077.1) was used in a BLASTP search against the NCBI non-redundant protein database in order to

determine its prevalence across bacteria. A maximum likelihood phylogeny of 5,000 sequences was constructed, revealing that many sequences most similar to Cp12 $\beta$ -HSDH are found in Firmicutes and Actinobacteria (**Fig. S2**). Within the 5,000-member phylogeny, a subtree (highlighted gray) of the most closely related proteins to Cp12 $\beta$ -HSDH was selected for closer inspection (**Fig. 4**). Cp12 $\beta$ -HSDH clustered most closely with other *C. paraputrificum* sequences (WP\_099327725, WP\_049179624, WP\_111937163-). These sequences are encoded by *C. paraputrificum* strains isolated from preterm infants, namely strain LH025, LH141, and LH058 (28), or isolated from feces (Gcol.A11) (29).

Firmicutes comprise the majority of sequences within the 12 $\beta$ -HSDH subtree, spanning genera including *Eisenbergiella*, *Ruminococcus*, and *Coprococcus*. In order to test if other organisms within the tree have bile acid 12 $\beta$ -HSDH activity, the gene encoding WP\_118677302.1 from *Eisenbergiella* sp. OF01-20 was synthesized in the codon-usage of *E. coli* by IDT (Table S1), cloned into pET-28a(+), overexpressed in *E. coli*, and purified by affinity chromatography (**Fig. S3**). Recombinant WP\_118677302.1 was screened by spectrophotometric assay with NAD(P)(H) against 12-oxoLCA, epiDCA, and DCA. WP\_118677302.1 exhibited 88% activity with 12-oxoLCA, and 83% activity with epiDCA relative to Cp12 $\beta$ -HSDH. WP\_118677302.1 did not show conversion of DCA, confirming that this enzyme has bile acid 12 $\beta$ -HSDH activity (Table 2).

The subtree also contains many sequences from Actinobacteria, the genera *Collinsella* and *Olsenella* among them. *Collinsella* species are of interest because *C. aerofaciens* has been shown to express bile salt hydrolase and various HSDHs recognizing sterols (30), including bile acid 12 $\alpha$ -HSDH (31). To determine if a member of the Actinobacteria encodes a bile acid 12 $\beta$ -HSDH, a sequence more distantly related to *C. paraputrificum* 12 $\beta$ -HSDH, *Olsenella* sp. GAM18 WP\_120179297.1, was chosen for gene synthesis and protein overexpression (Fig. S3). 12-oxoLCA, epiDCA and DCA were tested as substrates and conversion was measured by spectrophotometric assay. Recombinant WP\_120179297.1 displayed activity against 12-oxoLCA at 128% relative to Cp12 $\beta$ -HSDH, 69% relative activity against epiDCA, and showed no reaction

with DCA (Table 2). This data confirms that the more distantly related WP\_120179297.1 has bile acid 12 $\beta$ -HSDH activity.

Within the extended subtree are various *Novosphingobium* species. These Alphaproteobacteria deserve mention due to their ability to biodegrade aromatic compounds, such as phenanthrene (32) and estrogen (33). In order to test if this cluster has bile acid 12 $\beta$ -HSDH activity, WP\_007678535.1 from *Novosphingobium* sp. AP12 was synthesized, cloned, overexpressed, and purified (Fig. S3). The potential 12 $\beta$ -HSDH activity of WP\_007678535.1 was screened using 12-oxoLCA, epiDCA, and DCA as substrates. WP\_007678535.1 exhibited no activity with these bile acid substrates (Table 2). While bile acids contain a phenanthrene ring structure (1), it is likely the *Novosphingobium* sequences within our tree are not specific for bile acids as *Novosphingobium* strains are frequently plant-associated or isolated from aquatic environments (34).

### Phylogenetic analysis of regio- and stereospecific HSDHs

Next, the phylogenetic relationship between Cp12 $\beta$ -HSDH (WP\_027099077.1) and other regio- and stereospecific HSDHs was explored. To accomplish this, we updated the HSDH phylogeny presented by Mythen et al. (2018) by including additional bacterial or archaeal HSDH sequences of known or putative function along with representative eukaryotic sequences (**Fig. 5; Table S3**) (15). The sequences included span the known HSDH functional capacities, with some recognizing bile acids and others recognizing steroids like cortisol or progesterone. Most members of each HSDH class are clustered together, which is apparent by each color encompassing more than one HSDH of the same known function. Furthermore, most bacterial HSDHs grouped separately from their eukaryotic counterparts.

Prokaryotic sequences were interspersed among the eukaryotic with some exceptions in grouping by HSDH function. Cp12 $\beta$ -HSDH, the two other confirmed bile acid 12 $\beta$ -HSDHs (WP-118677302.1, WP\_120179297.1), and additional similar sequences from across our bile acid 12 $\beta$ -

HSDH subtree formed their own cluster. These sequences shared a branch with bacterial bile acid 12 $\alpha$ -HSDHs as well as eukaryotic 3 $\beta$ -HSD/ $\Delta^5 \rightarrow \Delta^4$ /isomerases. Bile acid 12 $\alpha$ -HSDHs sequences included various clostridia (EDS06338.1, EEG75500.1, EEA85268.1, ERJ00208.1) (10, 35) and *Eggerthella* (CDD59475.1) (15). *Collinsella aerofaciens* (EBA39192.1), which has been reported to express bile acid 12 $\alpha$ -HSDH activity (31), grouped with the known bile acid 12 $\alpha$ -HSDHs along with two human gut archaeal sequences from *Methanosphaera stadtmanae* and *Methanobrevibacter smithii*.

Clostridial (gram-positive) bile acid 7 $\alpha$ -HSDHs (AAB61151.1 etc.) (36) clustered separately from those expressed by *E. coli* (BAA01384.1) (37) and those predicted in *Bacteroides* (gram-negative), similarly to the Mythen et. al. phylogeny. One bile acid 7 $\alpha$ -HSDH from *B. fragilis* (WP\_005792012.1) (38) did not cluster with the others and instead shared a node with a predicted bile acid 12 $\alpha$ -HSDH from *C. perfringens* (WP\_096515955.1). Bile acid 7 $\beta$ -HSDHs did not closely cluster with other classes of bacterial HSDHs. Instead, the nearest neighbors to the three known bile acid 7 $\beta$ -HSDHs (WP\_006236005.1, WP\_004843516.1, AET80684.1) (30, 39, 40) included in this tree were eukaryotic steroid 11 $\beta$ - and 17 $\beta$ -HSDs.

Bacterial 3 $\alpha$ -HSDHs clustered together with one outlier from *Eggerthella lenta* (ACV54671.1) (41). Within the bile acid 3 $\alpha$ -HSDH group, four enzymes predicted with this function formed a separate branch apart from the confirmed bile acid 3 $\alpha$ -HSDHs. Likewise, three known bile acid 3 $\beta$ -HSDHs grouped together (ACV55294.1, ACV54192.1, EDN78833.1) (41), while one *Eggerthella* sequence was most closely related to putative bile acid 3 $\beta$ -HSDHs from *Lactobacillus* spp. identified by BLAST search in Mythen et. al 2018.

Bacterial steroid 20 $\beta$ -HSDHs convert the glucocorticoid cortisol to 20 $\beta$ -dihydrocortisol. Two experimentally confirmed 20 $\beta$ -HSDHs (WP\_003810233.1, WP\_051643274.1) (42, 43) grouped with putative sequences from both gut and urinary tract isolates. To date, only one steroid 20 $\alpha$ -HSDH sequence, which interconverts cortisol and 20 $\alpha$ -dihydrocortisol, has been reported (*C. scindens* EDS07887.1) (44, 45). Therefore, we performed a BLASTP search and found two

sequences with high similarity, WP\_145772308.1 from *Denitratisoma oestradiolicum* DSM 16959 and WP\_107631222.1 from *Intestinibacillus* sp. Marseille-P4005. *D. oestradiolicum* DSM 16959 was isolated from sludge in a municipal wastewater treatment plant and can use 17 $\beta$ -estradiol as a sole carbon and energy source (46). *Intestinibacillus massiliensis* strain Marseille-P3216, a close relative to *Intestinibacillus* sp. Marseille-P4005 found in our tree, was isolated from the human colon and is most closely related to the species *Butyricicoccus desmolans* (formerly *Eubacterium desmolans*) by 16S rRNA gene sequence (47). Interestingly, *B. desmolans* ATCC 43058 encodes a 20 $\beta$ -HSDH (WP\_051643274.1) (43).

Eukaryotic HSDH sequences, typically denoted HSD, were spread throughout the phylogeny, but generally grouped with like sequences. The 17 $\beta$ - and 11 $\beta$ -HSD sequences did not form a group, instead clustering by type. For example, *Homo sapiens* 11 $\beta$ -HSD type 1 (NP\_861420.1) was closely related to that of *Rattus norvegicus* (NP\_058776.2) and more distantly related to *Homo sapiens* 11 $\beta$ -HSD type 2 (NP\_000187.3). 11 $\beta$ -HSD type 1 and type 2 both interconvert steroids between active and inactive forms, such as cortisol and cortisone (48). However, 11 $\beta$ -HSD type 1 primarily acts as a reductase in many tissues while 11 $\beta$ -HSD type 2 functions as a dehydrogenase (48).

## DISCUSSION

Decades ago, it was established that *Eggerthella lenta* (formerly *Eubacterium lentum*) was capable of oxidizing bile acids at C-12 and epimerizing bile acids at C-3 (49, 50). Thereafter, pure cultures of *C. paraputrificum*, *C. tertium*, and *Clostridioides difficile* in binary cultures with *E. lenta* were shown to epimerize DCA via a 12-oxo-intermediate to epiDCA (51). Edenharder & Pfützner (1988) initially characterized NADP(H)-dependent 12 $\beta$ -HSDH from crude extracts of the fecal isolate *C. paraputrificum* strain D 762-06, with differing results from our findings (20). Gel filtration analysis of crude extract from *C. paraputrificum* strain D 762-06 suggested a molecular mass of 126 kDa; whereas our current work with Cp12 $\beta$ -HSDH from ATCC 25780 is estimated at 54.6



KDa by gel filtration chromatography. The strain used in this study, *C. paraputrificum* ATCC 25780, was also isolated from feces (52). It is possible that these are the same NADPH-dependent enzymes by sequence from two different strains of *C. paraputrificum* and that the recombinant protein quaternary structure is unstable, resulting in a dimeric form. Alternatively, these bacterial strains may have distinct versions of 12 $\beta$ -HSDH with different amino acid sequences, as we have shown previously for 12 $\alpha$ -HSDH from *Eggerthella lenta* (15, 53). Indeed, the 12 $\beta$ -HSDH from *C. paraputrificum* strain D 762-06 was reported to be partially membrane associated; however, hydropathy prediction by TMHMM v. 2.0 found no evidence of transmembrane domains in Cp12 $\beta$ -HSDH. In addition, pH optima for the conversion of 12-oxoLCA between Cp12 $\beta$ -HSDH (7.0) and the native 12 $\beta$ -HSDH (10.0) from strain D 762-06 differed. Oxidation of epiDCA was optimal at pH 7.5 for Cp12 $\beta$ -HSDH, and was reported as pH 7.8 for the crude native enzyme from strain D 762-06 (20). Further work will be needed to determine if distinct bile acid 12 $\beta$ -HSDHs are present in *C. paraputrificum* strains.

Cp12 $\beta$ -HSDH exhibited a dimeric quaternary structure by size-exclusion chromatography under our experimental conditions. Although future crystallization of Cp12 $\beta$ -HSDH would better illustrate its true polymeric state, HSDHs are often either tetrameric (42, 54–56) or dimeric (57–59). Cp12 $\beta$ -HSDH was more specific for bile acids lacking a position 7-hydroxyl group: epiDCA and 12-oxoLCA, over epiCA and 12-oxoCDCA. Cp12 $\beta$ -HSDH also had lower activity with 3,12-dioxoLCA versus 12-oxoLCA. This suggests that both the 7-hydroxyl and 3-oxo groups hinder the ability of Cp12 $\beta$ -HSDH to convert the substrate. An x-ray crystal structure of Cp12 $\beta$ -HSDH may shed light on why this apparent steric hindrance occurs. Moreover, crystallization would also aid in the rational engineering of Cp12 $\beta$ -HSDH to be more specific for these 7-hydroxy bile acids or for NAD(H) over NADP(H).

Phylogenetic analysis of Cp12 $\beta$ -HSDH coupled with synthetic biological “sampling” at different points along the branches revealed shared 12 $\beta$ -HSDH function among *Eisenbergiella* sp. OF01-20 and *Olsenella* sp. GAM18, lending functional credibility to sequences throughout the

subtree (Figure 4; Table 1). Indeed, this function joins the vast repertoire of HSDHs already studied in many Firmicutes and Actinobacteria (1). Bile acid 12 $\alpha$ -HSDH activity has been detected in *Eggerthella* species (15, 53) in the phylum Actinobacteria and various clostridia (10–12, 35) in the phylum Firmicutes. Similarly, 3 $\alpha$ - and 3 $\beta$ -HSDH are widespread among Firmicutes (14, 60–62), and 3 $\alpha$ -HSDH has also been reported in the Actinobacteria *Eggerthella* (13, 15, 41). 7 $\alpha$ - and 7 $\beta$ -HSDH were shown in numerous Firmicutes (14, 36, 61) and the Actinobacteria *Collinsella aerofaciens* (30). Along with these bile acid-specific HSDHs, the glucocorticoid 20 $\alpha$ - and 20 $\beta$ -HSDHs are evident in Firmicutes (43, 45, 63) and Actinobacteria such as *Bifidobacterium adolescentis* (64). Until this study, 12 $\beta$ -HSDH activity had only been shown in *C. paraputrificum*, *C. tertium* and *C. difficile* (51). Thus, our phylogenetic analysis revealed hitherto unknown diversity for bile acid 12 $\beta$ -HSDHs within the Firmicutes and Actinobacteria. Bacteroidetes sequences were notably absent within our 12 $\beta$ -HSDH subtree, although Bacteroidetes have been shown to encode other HSDHs (38, 65, 66). Interestingly, *C. tertium* and *C. difficile* enzymes were also not present in our phylogenetic analysis, although this activity has been reported for strains of these clostridia (19) suggesting that genes encoding other forms of bile acid 12 $\beta$ -HSDH are present in the gut microbiome.

The distribution pattern of microbial HSDHs is becoming increasingly clear (Figures 4 & 5), although in many cases the evolutionary pressures on gut microbes for encoding particular regio- and stereo-specific HSDH enzymes is not clear. As observed with bile salt hydrolase enzymes, the functional importance of HSDHs may be strain-dependent. In some strains, the mere ability to acquire or dispose of reducing equivalents may be important, and the class of enzyme unimportant. Bile acid hydroxylation patterns affect the binding and activation/inhibition of host nuclear receptors (67). HSDH enzymes may thus act in interkingdom-signaling, a hypothesis that has recent support based on the effect of oxidized and epimerized bile acids on the function of regulatory T cells (68, 69).

The concerted action of pairs of HSDHs result in bile acid products with reduced toxicity for the microbes expressing the HSDH(s), or for an important inter-species partner. Examples of strains of species capable of epimerizing bile acid hydroxyl groups are found in the literature, and the physicochemical properties and reduced toxicity of  $\beta$ -hydroxy bile acids are known, providing hypotheses for physiological function. *Clostridium limosum* (now *Hathewayia limosa*) expresses both bile acid-inducible NADP-dependent  $7\alpha$ - and  $7\beta$ -HSDH capable of converting CDCA to UDCA (70). CDCA is more hydrophilic and more toxic to bacteria than UDCA (6, 71). Indeed, treatment with UDCA increases the hydrophilicity of the biliary pool, reducing cellular toxicity and improves biliary disorders (72, 73). Similarly, strains of *Eggerthella lenta* (15, 41) and *Ruminococcus gnavus* (41) express both NADPH-dependent  $3\alpha$ - and  $3\beta$ -HSDHs capable of forming  $3\beta$ -bile acids (iso-bile acids). Iso-bile acids are also more hydrophilic and less toxic to bacteria than the  $\alpha$ -hydroxy isomers (41). At least some strains of *R. gnavus* also express NADPH-dependent  $7\beta$ -HSDH, contributing to the epimerization of CDCA to UDCA (39). It may be speculated that *R. gnavus* HSDHs function in detoxification of hydrophobic bile acids such as CDCA and DCA; however, further work is needed. Analogous to *E. lenta* and *R. gnavus*, *C. paraputrificum* is another example of a strain encoding multiple HSDHs that favor formation of  $\beta$ -hydroxy bile acids (19). *C. paraputrificum* strains encode the iso-bile acid pathway as well as NADPH-dependent  $12\beta$ -HSDH (19, 20). While little is known about the biological effects of  $12\beta$ -bile acids, the physicochemical properties relative to  $12\alpha$ -hydroxy bile acids should approximate that of iso- and urso-derivatives (6, 41, 71). An important question emerging from these observations is whether one particular epimeric product rather than another has important consequences on the fitness of the bacterium generating them, or if the increased hydrophilicity and reduced toxicity are the key factors.

Since the initial detection of  $12\beta$ -hydroxy bile acids by Eneroth et. al. and Ali et. al. (16–18), the measurement of bile acid metabolomes in clinical samples has become commonplace (74, 75), yet few studies measure or report  $12\beta$ -hydroxy bile acids. Recently,  $12\beta$ -hydroxy and

12-oxo-bile acids have been quantified in human feces by Franco et. al. (2019). 12-oxoLCA was shown to be the most abundant oxo-bile acid in feces at concentrations of about one half that of DCA in stool. While epiDCA itself was not measured, 3-oxo-12 $\beta$ -hydroxy-CDCA was shown at 12  $\pm$  4  $\mu$ g/g wet feces (76). A critical limitation to the study of 12 $\beta$ -hydroxy bile acids is the absence of commercially available standards, although there are methods available for chemical synthesis (77, 78). The newly identified bile acid 12 $\beta$ -HSDHs could be employed for the enzymatic production of epi-bile acid standards from oxo-intermediates. By coupling a 12 $\beta$ -HSDH with a 12 $\alpha$ -HSDH, the full 12-epimerization pathway could be utilized to industrially synthesize epi-bile acids from the less expensive bile acids DCA or CA.

The physiological effects of 12 $\beta$ -hydroxy bile acids are poorly characterized, particularly in the GI tract. Borgström and colleagues compared infusion of CA, ursoCA, and epiCA on bile flow, lipid secretion, bile acid synthesis, and bile micellar formation. In contrast to ursoCA and CA, epiCA was secreted into bile in an unconjugated form. The 12 $\beta$ -hydroxyl group may hinder the enzyme responsible for conjugation. Additionally, epiCA infusion led to an increase in the rate of secretion of newly synthesized bile salts (79). Future studies with animal models will be imperative to determine the effects of 12 $\beta$ -hydroxy bile acids on host physiology.

## **ACKNOWLEDGMENTS**

We gratefully acknowledge support to J.M.R. for this work by the National Cancer Institute grant 1RO1 CA204808-01, as well as USDA Hatch ILLU-538-916 and Illinois Campus Research Board RB18068. H.D. is supported by the David H. and Norraine A. Baker Graduate Fellowship in Animal Sciences. We would like to express our very great appreciation to Dr. Lee R. Hagey for providing the critical substrates epiDCA and epiCA.

## **REFERENCES**

1. Ridlon, J. M., D.-J. Kang, and P. B. Hylemon. 2006. Bile salt biotransformations by human

- intestinal bacteria. *J. Lipid Res.* **47**: 241–259.
2. Vlahcevic ZR, Heuman DM, H. P. 1996. Physiology and pathophysiology of enterohepatic circulation of bile acids. In *Hepatology: A Textbook of Liver Disease*. 3rd edition. Vol. 1. D.
  3. Dawson, P. A., and S. J. Karpen. 2015. Intestinal transport and metabolism of bile acids. *J. Lipid Res.* **56**: 1085–1099.
  4. Jones, B. V., M. Begley, C. Hill, C. G. M. Gahan, and J. R. Marchesi. 2008. Functional and comparative metagenomic analysis of bile salt hydrolase activity in the human gut microbiome. *Proc. Natl. Acad. Sci. U. S. A.* **105**: 13580–13585.
  5. Ridlon, J. M., S. C. Harris, S. Bhowmik, D. J. Kang, and P. B. Hylemon. 2016. Consequences of bile salt biotransformations by intestinal bacteria. *Gut Microbes.* **7**: 22–39.
  6. Watanabe, M., S. Fukiya, and A. Yokota. 2017. Comprehensive evaluation of the bactericidal activities of free bile acids in the large intestine of humans and rodents. *J. Lipid Res.* **58**: 1143–1152.
  7. Bernstein, C., H. Holubec, A. K. Bhattacharyya, H. Nguyen, C. M. Payne, B. Zaitlin, and H. Bernsterin. 2011. Carcinogenicity of deoxycholate, a secondary bile acid. *Arch. Toxicol.* **85**: 863–871.
  8. Yoshimoto, S., T. M. Loo, K. Atarashi, H. Kanda, S. Sato, S. Oyadomari, Y. Iwakura, K. Oshima, H. Morita, M. Hattori, K. Honda, Y. Ishikawa, E. Hara, and N. Ohtani. 2013. Obesity-induced gut microbial metabolite promotes liver cancer through senescence secretome. *Nature.* **499**: 97–101.
  9. Wu, J. T., J. Gong, J. Geng, and Y. X. Song. 2008. Deoxycholic acid induces the overexpression of intestinal mucin, MUC2, via NF- $\kappa$ B signaling pathway in human esophageal adenocarcinoma cells. *BMC Cancer.* **8**: 1–10.
  10. Doden, H., L. A. Sallam, S. Devendran, L. Ly, G. Doden, S. L. Daniel, and J. M. Ridlon. 2018. Metabolism of Oxo-Bile Acids and Characterization of Recombinant 12 $\alpha$ -

- Hydroxysteroid Dehydrogenases from Bile Acid 7 $\alpha$ -Dehydroxylating Human Gut Bacteria. *Appl. Environ. Microbiol.* **84**: e00235-18.
11. Macdonald, I. A., J. F. Jellett, and D. E. Mahony. 1979. 12 $\alpha$ -Hydroxysteroid dehydrogenase from *Clostridium* group P strain C48-50 ATCC #29733: partial purification and characterization. *J. Lipid Res.* **20**: 234–239.
  12. Harris, J. N., and P. B. Hylemon. 1978. Partial purification and characterization of NADP-dependent 12 $\alpha$ -hydroxysteroid dehydrogenase from *Clostridium leptum*. *Biochim. Biophys. Acta.* **528**: 148–157.
  13. Macdonald, I. A., J. F. Jellett, D. E. Mahony, and L. V. Holdeman. 1979. Bile salt 3 $\alpha$ - and 12 $\alpha$ -hydroxysteroid dehydrogenases from *Eubacterium lentum* and related organisms. *Appl. Environ. Microbiol.* **37**: 992–1000.
  14. Macdonald, I. A., E. C. Meier, D. E. Mahony, and G. A. Costain. 1976. 3 $\alpha$ -, 7 $\alpha$ - And 12 $\alpha$ -hydroxysteroid dehydrogenase activities from *Clostridium perfringens*. *Biochim. Biophys. Acta.* **450**: 142–153.
  15. Mythen, S. M., S. Devendran, C. Méndez-García, I. Cann, and J. M. Ridlon. 2018. Targeted synthesis and characterization of a gene cluster encoding NAD(P)H-dependent 3 $\alpha$ -, 3 $\beta$ -, and 12 $\alpha$ -hydroxysteroid dehydrogenases from *Eggerthella* CAG:298, a gut metagenomic sequence. *Appl. Environ. Microbiol.* **84**: e02475-17.
  16. Ali, S. S., A. Kuksis, and J. M. Beveridge. 1966. Excretion of bile acids by three men on corn oil and butterfat diets. *Can. J. Biochem.* **44**: 1377–1388.
  17. Ali, S. S., A. Kuksis, and J. M. Beveridge. 1966. Excretion of bile acids by three men on a fat-free diet. *Can. J. Biochem.* **44**: 957–969.
  18. Eneroth, P., B. Gordon, R. Ryhage, and J. Sjövall. 1966. Identification of mono- and dihydroxy bile acids in human feces by gas-liquid chromatography and mass spectrometry. *J. Lipid Res.* **7**: 511–523.
  19. Edenharder, R., and J. Schneider. 1985. 12 $\beta$ -Dehydrogenation of bile acids by *Clostridium*

- paraputrificum*, *C. tertium*, and *C. difficile* and epimerization at carbon-12 of deoxycholic acid by cocultivation with 12 $\alpha$ -dehydrogenating *Eubacterium lentum*. *Appl. Environ. Microbiol.* **49**: 964–968.
20. Edenharder, R., and A. Pfützner. 1988. Characterization of NADP-dependent 12 $\beta$ -hydroxysteroid dehydrogenase from *Clostridium paraputrificum*. *Biochim. Biophys. Acta.* **962**: 362–370.
21. Krogh, A., B. Larsson, G. Von Heijne, and E. L. L. Sonnhammer. 2001. Predicting transmembrane protein topology with a hidden Markov model: Application to complete genomes. *J. Mol. Biol.* **305**: 567–580.
22. Eneroth, P. 1963. Thin-layer chromatography of bile acids. *J. Lipid Res.* **4**: 11–16.
23. Camacho, C., G. Coulouris, V. Avagyan, N. Ma, J. Papadopoulos, K. Bealer, and T. L. Madden. 2009. BLAST+: Architecture and applications. *BMC Bioinformatics.* **10**: 1–9.
24. Edgar, R. C. 2004. MUSCLE: Multiple sequence alignment with high accuracy and high throughput. *Nucleic Acids Res.* **32**: 1792–1797.
25. Stamatakis, A. 2014. RAxML version 8: A tool for phylogenetic analysis and post-analysis of large phylogenies. *Bioinformatics.* **30**: 1312–1313.
26. Huson, D. H., D. C. Richter, C. Rausch, T. Dezulian, M. Franz, and R. Rupp. 2007. Dendroscope: An interactive viewer for large phylogenetic trees. *BMC Bioinformatics.* **8**: 460.
27. Penning, T. M. 2011. Human hydroxysteroid dehydrogenases and pre-receptor regulation: Insights into inhibitor design and evaluation. *J. Steroid Biochem. Mol. Biol.* **125**: 46–56.
28. Kiu, R., S. Caim, C. Alcon-Giner, G. Belteki, P. Clarke, D. Pickard, G. Dougan, and L. J. Hall. 2017. Preterm infant-associated *Clostridium tertium*, *Clostridium cadaveris*, and *Clostridium paraputrificum* strains: Genomic and evolutionary insights. *Genome Biol. Evol.* **9**: 2707–2714.
29. Muñoz, M., D. Restrepo-Montoya, N. Kumar, G. Iraola, G. Herrera, D. I. Ríos-Chaparro, D.

- Díaz-Arévalo, M. A. Patarroyo, T. D. Lawley, and J. D. Ramírez. 2019. Comparative genomics identifies potential virulence factors in *Clostridium tertium* and *C. paraputrificum*. *Virulence*. **10**: 657–676.
30. Liu, L., A. Aigner, and R. D. Schmid. 2011. Identification, cloning, heterologous expression, and characterization of a NADPH-dependent 7 $\beta$ -hydroxysteroid dehydrogenase from *Collinsella aerofaciens*. *Appl. Microbiol. Biotechnol.* **90**: 127–135.
31. Wegner, K., S. Just, L. Gau, H. Mueller, P. Gérard, P. Lepage, T. Clavel, and S. Rohn. 2017. Rapid analysis of bile acids in different biological matrices using LC-ESI-MS/MS for the investigation of bile acid transformation by mammalian gut bacteria. *Anal. Bioanal. Chem.* **409**: 1231–1245.
32. Sohn, J. H., K. K. Kwon, J. H. Kang, H. B. Jung, and S. J. Kim. 2004. *Novosphingobium pentaromativorans* sp. nov., a high-molecular-mass polycyclic aromatic hydrocarbon-degrading bacterium isolated from estuarine sediment. *Int. J. Syst. Evol. Microbiol.* **54**: 1483–1487.
33. Hashimoto, T., K. Onda, T. Morita, B. S. Luxmy, K. Tada, A. Miya, and T. Murakami. 2010. Contribution of the estrogen-degrading bacterium *Novosphingobium* sp. strain JEM-1 to estrogen removal in wastewater treatment. *J. Environ. Eng.* **136**: 890–896.
34. Gan, H. M., A. O. Hudson, A. Y. A. Rahman, K. G. Chan, and M. A. Savka. 2013. Comparative genomic analysis of six bacteria belonging to the genus *Novosphingobium*: Insights into marine adaptation, cell-cell signaling and bioremediation. *BMC Genomics.* **14**: 431.
35. Aigner, A., R. Gross, R. Schmid, M. Braun, and S. Mauer. 2011. Novel 12 $\alpha$ -hydroxysteroid dehydrogenases, production and use thereof. US patent 20110091921A1.
36. Baron, S. F., C. V. Franklund, and P. B. Hylemon. 1991. Cloning, sequencing, and expression of the gene coding for bile acid 7 $\alpha$ -hydroxysteroid dehydrogenase from *Eubacterium* sp. strain VPI 12708. *J. Bacteriol.* **173**: 4558–4569.



37. Tanaka, N., T. Nonaka, T. Tanabe, T. Yoshimoto, D. Tsuru, and Y. Mitsui. 1996. Crystal structures of the binary and ternary complexes of 7 $\alpha$ -hydroxysteroid dehydrogenase from *Escherichia coli*. *Biochemistry*. **35**: 7715–7730.
38. Bennett, M. J., S. L. McKnight, and J. P. Coleman. 2003. Cloning and Characterization of the NAD-Dependent 7 $\alpha$ -Hydroxysteroid Dehydrogenase from *Bacteroides fragilis*. *Curr. Microbiol.* **47**: 475–484.
39. Lee, J. Y., H. Arai, Y. Nakamura, S. Fukiya, M. Wada, and A. Yokota. 2013. Contribution of the 7 $\beta$ -hydroxysteroid dehydrogenase from *Ruminococcus gnavus* N53 to ursodeoxycholic acid formation in the human colon. *J. Lipid Res.* **54**: 3062–3069.
40. Ferrandi, E. E., G. M. Bertolesi, F. Polentini, A. Negri, S. Riva, and D. Monti. 2012. In search of sustainable chemical processes: Cloning, recombinant expression, and functional characterization of the 7 $\alpha$ - and 7 $\beta$ -hydroxysteroid dehydrogenases from *Clostridium absonum*. *Appl. Microbiol. Biotechnol.* **95**: 1221–1233.
41. Devlin, A. S., and M. A. Fischbach. 2015. A biosynthetic pathway for a prominent class of microbiota-derived bile acids. *Nat. Chem. Biol.* **11**: 685–690.
42. Doden, H. L., R. M. Pollet, S. M. Mythen, Z. Wawrzak, S. Devendran, I. Cann, N. M. Koropatkin, and J. M. Ridlon. 2019. Structural and biochemical characterization of 20 $\beta$ -hydroxysteroid dehydrogenase from *Bifidobacterium adolescentis* strain L2-32. *J. Biol. Chem.* **294**: 12040–12053.
43. Devendran, S., C. Méndez-García, and J. M. Ridlon. 2017. Identification and characterization of a 20 $\beta$ -HSDH from the anaerobic gut bacterium *Butyrivibrio desmolans* ATCC 43058. *J. Lipid Res.* **58**: 916–925.
44. Ridlon, J. M., S. Ikegawa, J. M. P. Alves, B. Zhou, A. Kobayashi, T. Iida, K. Mitamura, G. Tanabe, M. Serrano, A. De Guzman, P. Cooper, G. A. Buck, and P. B. Hylemon. 2013. *Clostridium scindens*: a human gut microbe with a high potential to convert glucocorticoids into androgens. *J. Lipid Res.* **54**: 2437–2449.

45. Bernardi, R., H. Doden, M. Melo, S. Devendran, R. Pollet, S. Mythen, S. Bhowmik, S. Lesley, I. Cann, Z. Luthey-Schulten, N. Koropatkin, and J. Ridlon. 2020. Bacteria on steroids: the enzymatic mechanism of an NADH-dependent dehydrogenase that regulates the conversion of cortisol to androgen in the gut microbiome. Submitted for publication.
46. Fahrbach, M., J. Kuever, R. Meinke, P. Kämpfer, and J. Hollender. 2006. *Denitratisoma oestradiolicum* gen. nov., sp. nov., a 17 $\beta$ -oestradiol-degrading, denitrifying betaproteobacterium. *Int. J. Syst. Evol. Microbiol.* **56**: 1547–1552.
47. Ricaboni, D., M. Mailhe, V. Vitton, F. Cadoret, P. E. Fournier, and D. Raoult. 2017. '*Intestinibacillus massiliensis*' gen. nov., sp. nov., isolated from human left colon. *New Microbes New Infect.* **17**: 18–20.
48. Morris, D. J., and J. M. Ridlon. 2017. Glucocorticoids and gut bacteria: “The GALF Hypothesis” in the metagenomic era. *Steroids.* **125**: 1–13.
49. Hirano, S., and N. Masuda. 1981. Transformation of bile acids by *Eubacterium lentum*. *Appl. Environ. Microbiol.* **42**: 912–915.
50. Edenharder, R., and K. Mielek. 1984. Epimerization, oxidation and reduction of bile acids by *Eubacterium lentum*. *Syst. Appl. Microbiol.* **5**: 287–298.
51. Edenharder, R., and J. Schneider. 1985. 12 $\beta$ -Dehydrogenation of bile acids by *Clostridium paraputrificum*, *C. tertium*, and *C. difficile* and epimerization at carbon-12 of deoxycholic acid by cocultivation with 12 $\alpha$ -dehydrogenating *Eubacterium lentum*. *Appl. Environ. Microbiol.* **49**: 964–968.
52. Snyder, M. L. 1936. The serologic agglutinin of the obligate anaerobes *Clostridium paraputrificum* (Beinstock) and *Clostridium capitovalis* (Snyder and Hall). *J. Bacteriol.* **32**: 401–410.
53. Harris, S. C., S. Devendran, C. Méndez- García, S. M. Mythen, C. L. Wright, C. J. Fields, A. G. Hernandez, I. Cann, P. B. Hylemon, and J. M. Ridlon. 2018. Bile acid oxidation by

- Eggerthella lenta* strains C592 and DSM 2243. *Gut Microbes*. **9**: 523–539.
54. Ghosh, D., Z. Wawrzak, C. M. Weeks, W. L. Duax, and M. Erman. 1994. The refined three-dimensional structure of 3 $\alpha$ ,20 $\beta$ -hydroxysteroid dehydrogenase and possible roles of the residues conserved in short-chain dehydrogenases. *Structure*. **2**: 629–640.
55. Benach, J., C. Filling, U. C. T. Oppermann, P. Roversi, G. Bricogne, K. D. Berndt, H. Jörnvall, and R. Ladenstein. 2002. Structure of bacterial 3 $\beta$ /17 $\beta$ -hydroxysteroid dehydrogenase at 1.2 Å resolution: A model for multiple steroid recognition. *Biochemistry*. **41**: 14659–14668.
56. Hosfield, D. J., Y. Wu, E. J. Skene, M. Hilgers, A. Jennings, G. P. Snell, and K. Aertgeerts. 2005. Conformational flexibility in crystal structures of human 11 $\beta$ -hydroxysteroid dehydrogenase type I provide insights into glucocorticoid interconversion and enzyme regulation. *J. Biol. Chem.* **280**: 4639–4648.
57. Grimm, C., E. Maseri, E. Möbusi, G. Klebe, K. Reuter, and R. Ficner. 2000. The crystal structure of 3 $\alpha$ -hydroxysteroid dehydrogenase/carbonyl reductase from *Comamonas testosteroni* shows a novel oligomerization pattern within the short chain dehydrogenase/reductase family. *J. Biol. Chem.* **275**: 41333–41339.
58. Savino, S., E. E. Ferrandi, F. Forneris, S. Roviola, S. Riva, D. Monti, and A. Mattevi. 2016. Structural and biochemical insights into 7 $\beta$ -hydroxysteroid dehydrogenase stereoselectivity. *Proteins*. **84**: 859–865.
59. Ghosh, D., V. Z. Pletnev, D. W. Zhu, Z. Wawrzak, W. L. Duax, W. Pangborn, F. Labrie, and S. X. Lin. 1995. Structure of human estrogenic 17 $\beta$ -hydroxysteroid dehydrogenase at 2.20 Å resolution. *Structure*. **3**: 503–513.
60. Edenharder, R., A. Pfützner, and R. Hammann. 1989. Characterization of NAD-dependent 3 $\alpha$ - and 3 $\beta$ -hydroxysteroid dehydrogenase and of NADP-dependent 7 $\beta$ -hydroxysteroid dehydrogenase from *Peptostreptococcus productus*. *Biochim. Biophys. Acta*. **1004**: 230–238.

61. Edenharder, R., M. Pfützner, and R. Hammann. 1989. NADP-dependent 3 $\beta$ -, 7 $\alpha$ - and 7 $\beta$ -hydroxysteroid dehydrogenase activities from a lecithinase-lipase-negative *Clostridium* species 25.11.c. *Biochim. Biophys. Acta.* **1002**: 37–44.
62. Mallonee, D. H., M. A. Lijewski, and P. B. Hylemon. 1995. Expression in *Escherichia coli* and characterization of a bile acid-inducible 3 $\alpha$ -hydroxysteroid dehydrogenase from *Eubacterium* sp. strain VPI 12708. *Curr. Microbiol.* **30**: 259–263.
63. Devendran, S., S. M. Mythen, and J. M. Ridlon. 2018. The *desA* and *desB* genes from *Clostridium scindens* ATCC 35704 encode steroid-17,20-desmolase. *J. Lipid Res.* **59**: 1005–1014.
64. Ridlon, J. M., S. Devendran, J. M. Alves, H. Doden, P. G. Wolf, G. V. Pereira, L. Ly, A. Volland, H. Takei, H. Nittono, T. Murai, T. Kurosawa, G. E. Chlipala, S. J. Green, A. G. Hernandez, C. J. Fields, C. L. Wright, G. Kakiyama, I. Cann, P. Kashyap, V. McCracken, and H. R. Gaskins. 2020. The ‘in vivo lifestyle’ of bile acid 7 $\alpha$ -dehydroxylating bacteria: comparative genomics, metatranscriptomic, and bile acid metabolomics analysis of a defined microbial community in gnotobiotic mice. *Gut Microbes.* **11**: 381–404.
65. Sherrod, J. A., and P. B. Hylemon. 1977. Partial purification and characterization of NAD-dependent 7 $\alpha$ -hydroxysteroid dehydrogenase from *Bacteroides thetaiotaomicron*. **486**: 351–358.
66. Fukiya, S., M. Arata, H. Kawashima, D. Yoshida, M. Kaneko, K. Minamida, J. Watanabe, Y. Ogura, K. Uchida, K. Itoh, M. Wada, S. Ito, and A. Yokota. 2009. Conversion of cholic acid and chenodeoxycholic acid into their 7-oxo derivatives by *Bacteroides intestinalis* AM-1 isolated from human feces. *FEMS Microbiol. Lett.* **293**: 263–270.
67. Wahlström, A., P. Kovatcheva-Datchary, M. Ståhlman, F. Bäckhed, and H. U. Marschall. 2017. Crosstalk between Bile Acids and Gut Microbiota and Its Impact on Farnesoid X Receptor Signalling. *Dig. Dis.* **35**: 246–250.
68. Song, X., X. Sun, S. F. Oh, M. Wu, Y. Zhang, W. Zheng, N. Geva-Zatorsky, R. Jupp, D.

- Mathis, C. Benoist, and D. L. Kasper. 2020. Microbial bile acid metabolites modulate gut ROR $\gamma$ + regulatory T cell homeostasis. *Nature*. **577**: 410–415.
69. Campbell, C., P. T. McKenney, D. Konstantinovskiy, O. I. Isaeva, M. Schizas, J. Verter, C. Mai, W. B. Jin, C. J. Guo, S. Violante, R. J. Ramos, J. R. Cross, K. Kadaveru, J. Hambor, and A. Y. Rudensky. 2020. Bacterial metabolism of bile acids promotes generation of peripheral regulatory T cells. *Nature*. **581**: 475–479.
70. Sutherland, J. D., and C. N. Williams. 1985. Bile acid induction of 7 $\alpha$ - and 7 $\beta$ -hydroxysteroid dehydrogenases in *Clostridium limosum*. *J. Lipid Res.* **26**: 344–350.
71. Hofmann, A. F., and A. Roda. 1984. Physicochemical properties of bile acids and their relationship to biological properties: An overview of the problem. *J. Lipid Res.* **25**: 1477–1489.
72. Goossens, J., and C. Bailly. 2019. Ursodeoxycholic acid and cancer: From chemoprevention to chemotherapy. *Pharmacol. Ther.* **203**: 107396.
73. Wang, D. Q. H., and M. C. Carey. 2014. Therapeutic uses of animal biles in traditional Chinese medicine: An ethnopharmacological, biophysical chemical and medicinal review. *World J. Gastroenterol.* **20**: 9952–9975.
74. Liu, Y., Z. Rong, D. Xiang, C. Zhang, and D. Liu. 2018. Detection technologies and metabolic profiling of bile acids: A comprehensive review. *Lipids Health Dis.* **17**: 121.
75. Fiori, J., S. Turrone, M. Candela, and R. Gotti. 2020. Assessment of gut microbiota fecal metabolites by chromatographic targeted approaches. *J. Pharm. Biomed. Anal.* **177**: 112867.
76. Franco, P., E. Porru, J. Fiori, A. Gioiello, B. Cerra, G. Roda, C. Caliceti, P. Simoni, and A. Roda. 2019. Identification and quantification of oxo-bile acids in human faeces with liquid chromatography–mass spectrometry: A potent tool for human gut acidic sterolbiome studies. *J. Chromatogr. A.* **1585**: 70–81.
77. Chang, F. C. 1981. Potential Bile Acid Metabolites. 5.1 12 $\beta$ -Hydroxy Acids By

Stereoselective Reduction. *Synth. Commun.* **11**: 875–879.

78. Iida, T., T. Momose, F. C. Chang, and T. Nambara. 1986. Potential Bile Acid Metabolites.

XI. Syntheses of Stereoisomeric 7,12-Dihydroxy-5 $\alpha$ -cholanic Acids. *Chem. Pharm. Bull.*

**34**: 1934–1938.

79. Borgström, B., J. Barrowman, L. Krabisch, M. Lindström, and J. Lillienau. 1986. Effects of cholic acid, 7 $\beta$ -hydroxy- and 12 $\beta$ -hydroxy-isocholeic acid on bile flow, lipid secretion and bile acid synthesis in the rat. *Scand. J. Clin. Lab. Invest.* **46**: 167–175.

## FIGURES

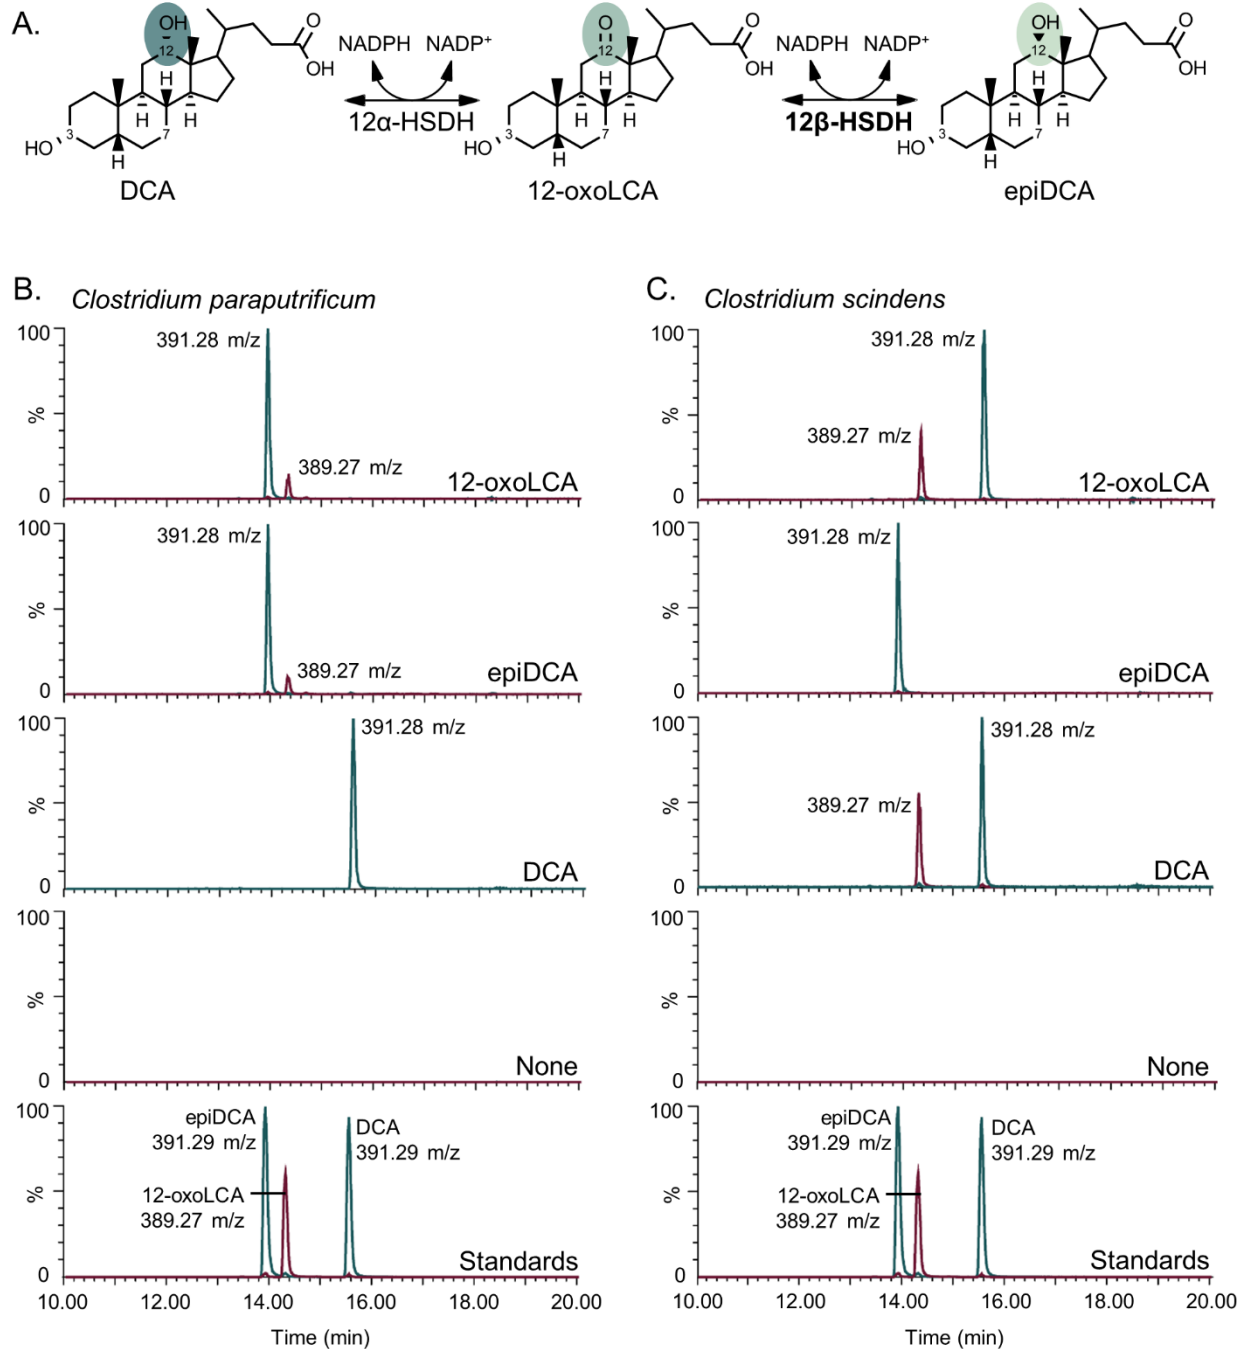

**Figure 1. Depiction of the reaction catalyzed by 12 $\alpha$ - and 12 $\beta$ -HSDH and whole-cell LC-MS.**

(A) The secondary bile acid deoxycholic acid (DCA) is converted to the oxo-intermediate, 12-oxolithocholic acid (12-oxoLCA), by NAD(P)-dependent 12 $\alpha$ -HSDH and from 12-oxoLCA to epiDCA by 12 $\beta$ -HSDH. (B) Representative negative ion mode LC-MS chromatograms in single

ion monitoring mode overlaid with linked vertical axes of *C. paraputrificum* reaction products from 50 uM substrate compared to deoxycholic acid (DCA), 12-oxolithocholic acid (12-oxoLCA) and epiDCA standards. (C) As a control, representative negative ion mode LC-MS chromatograms in single ion monitoring mode overlaid with linked vertical axes of *C. scindens* products from 50 uM substrate was used to demonstrate 12 $\alpha$ -HSDH activity. Standards are shown in B and C for ease of comparison to products. Formula weight for DCA is 392.57 atomic mass units (amu), 12-oxoLCA is 390.56 amu, epiDCA is 392.57 amu.



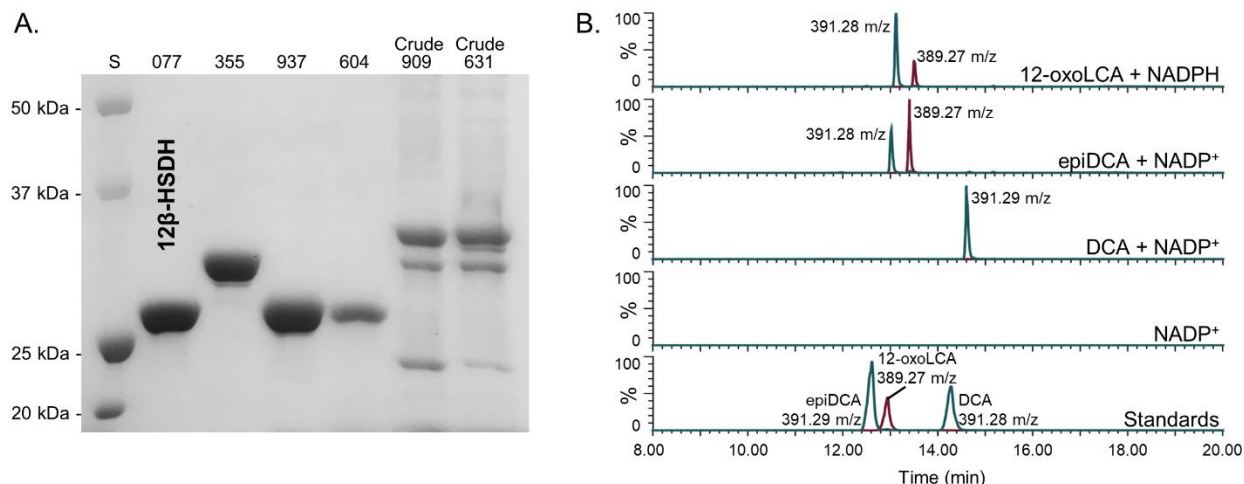

**Figure 2. Identification of a gene encoding 12 $\beta$ -HSDH.** (A) SDS-PAGE of candidate *Clostridium paraputrificum* 12 $\beta$ -HSDH proteins that were heterologously expressed in *E. coli* and purified with TALON® metal affinity resin. Lanes are as follows: S, molecular weight protein standard; 077, WP\_027099077.1; 355, WP\_027098355.1; 937, WP\_027097937.1; 604, WP\_027098604.1; 909, WP\_027096909.1; 631, WP\_027099631.1. (B) Representative negative ion mode LC-MS chromatograms in single ion monitoring mode overlaid with linked vertical axes of WP\_027099077.1 reaction products compared to deoxycholic acid (DCA), 12-oxolithocholic acid (12-oxoLCA) and epiDCA standards. Standards were run on a separate day and show a slight offset in elution time. Reactions consisted of 10 nM WP\_027099077.1 with 50  $\mu$ M (or no) substrate, 150  $\mu$ M pyridine nucleotide in 50 mM sodium phosphate, 150 mM sodium chloride buffer at pH 7. Formula weight for DCA is 392.57 atomic mass units (amu), 12-oxoLCA is 390.56 amu, epiDCA is 392.57 amu.

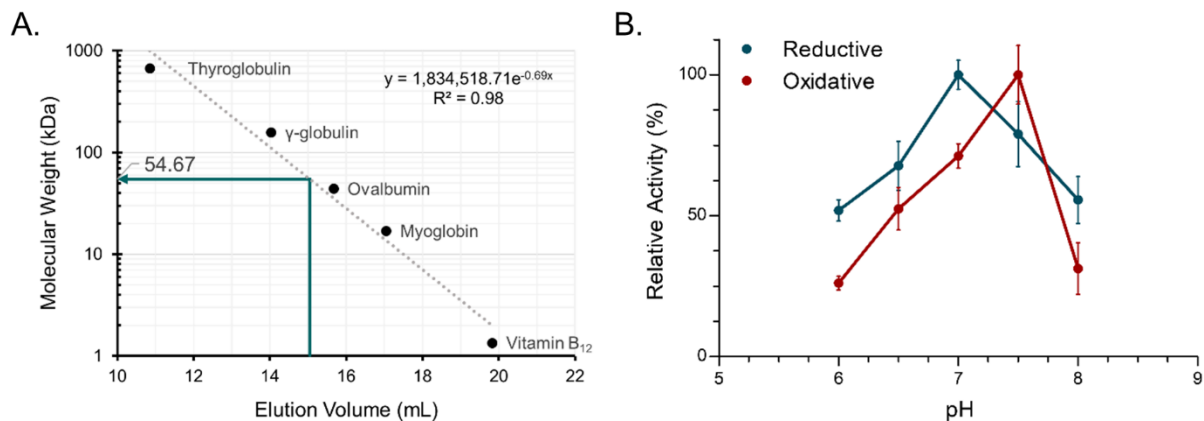

**Figure 3. Biochemical characterization of recombinant *C. paraptrophicum* 12 $\beta$ -HSDH.** (A) Native molecular size analysis of 10 mg/mL purified 12 $\beta$ -HSDH via size-exclusion chromatography. (B) Effect of pH on 12 $\beta$ -HSDH activity. The reaction in the reductive direction (blue) consisted of 12-oxoLCA as substrate with NADPH as cofactor. The oxidative reaction (red) was epiDCA with NADP<sup>+</sup>. See Materials and Methods for buffer compositions.

**Table 1.** Substrate and pyridine nucleotide specificity of purified recombinant *C. paraputrificum* 12 $\beta$ -HSDH, *Eisenbergiella* WP\_118677302.1, *Olsenella* WP\_120179297.1, and *Novosphingobium* WP\_007678535.1.

| Enzyme             | Substrate <sup>a,b</sup> | Cofactor          | Activity<br>( $\mu\text{mol}\cdot\text{min}^{-1}\cdot\text{mg}^{-1}$ ) | Relative activity (%) |
|--------------------|--------------------------|-------------------|------------------------------------------------------------------------|-----------------------|
| Cp12 $\beta$ -HSDH | 12-oxoLCA                | NADPH             | 18.26 $\pm$ 1.01 <sup>c</sup>                                          | 100                   |
|                    | 12-oxoLCA                | NADH              | - <sup>d</sup>                                                         | -                     |
|                    | 12-oxoCDCA               | NADPH             | 2.21 $\pm$ 0.82                                                        | 12.08                 |
|                    | 3,12-dioxoLCA            | NADPH             | 3.49 $\pm$ 0.34                                                        | 19.09                 |
| WP_118677302.1     | 12-oxoLCA                | NADPH             | 16.04 $\pm$ 1.23                                                       | 87.85                 |
| WP_120179297.1     | 12-oxoLCA                | NADPH             | 23.29 $\pm$ 2.57                                                       | 127.57                |
| WP_007678535.1     | 12-oxoLCA                | NADPH             | -                                                                      | -                     |
| Cp12 $\beta$ -HSDH | epiDCA                   | NADP <sup>+</sup> | 33.42 $\pm$ 0.81                                                       | 100                   |
|                    | epiDCA                   | NAD <sup>+</sup>  | -                                                                      | -                     |
|                    | epiCA                    | NADP <sup>+</sup> | 8.99 $\pm$ 0.90                                                        | 26.88                 |
|                    | DCA                      | NADP <sup>+</sup> | -                                                                      | -                     |
|                    | CA                       | NADP <sup>+</sup> | -                                                                      | -                     |
|                    | CDCA                     | NADP <sup>+</sup> | -                                                                      | -                     |
| WP_118677302.1     | epiDCA                   | NADP <sup>+</sup> | 27.85 $\pm$ 1.12                                                       | 83.32                 |
| WP_120179297.1     | epiDCA                   | NADP <sup>+</sup> | 23.02 $\pm$ 2.57                                                       | 68.86                 |
| WP_007678535.1     | epiDCA                   | NADP <sup>+</sup> | -                                                                      | -                     |

<sup>a</sup>12-oxolithocholic acid (12-oxoLCA), 12-oxochenodeoxycholic acid (12-oxoCDCA), deoxycholic acid (DCA), cholic acid (CA).

<sup>b</sup> Assays were performed with 10nM enzyme, 50uM substrate and 150uM cofactor at optimum pH.

<sup>c</sup>Values represent the mean  $\pm$  SD of three or more replicates.

<sup>d</sup>-, no activity detected.

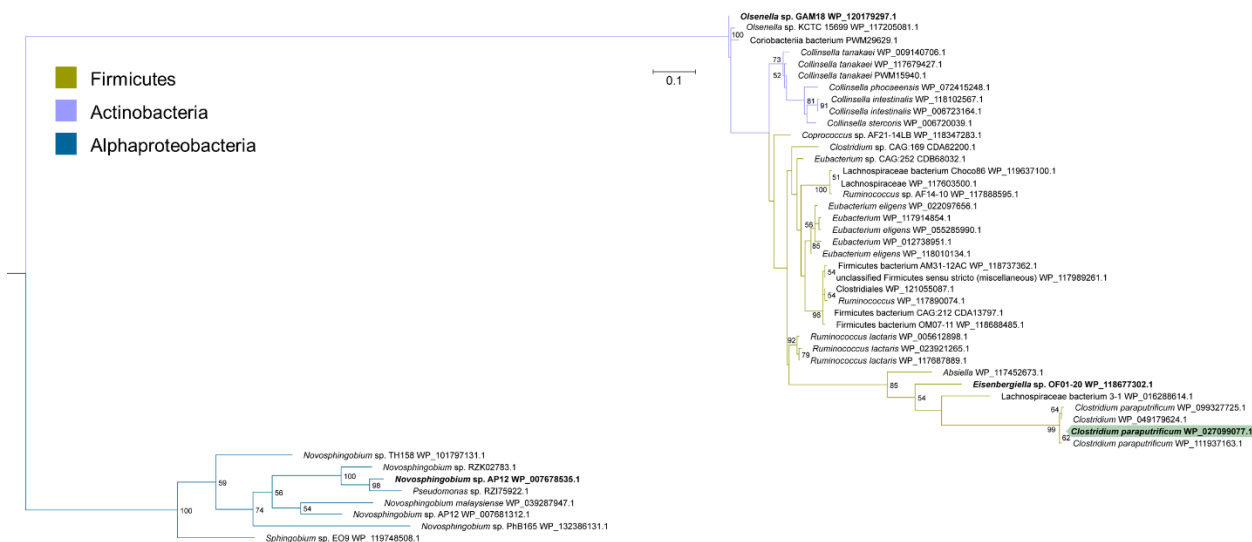

**Figure 4. Maximum-likelihood tree based on a subset of the taxa present in the full phylogenetic analysis of 12 $\beta$ -HSDH.** Sequences selected for this analysis were those nearest to the *C. paraputrificum* 12 $\beta$ -HSDH (highlighted), plus an outgroup. For the full tree with around 5,000 sequences, see Figure S1. Taxonomic affiliations are indicated by branch colors as specified in the legend.

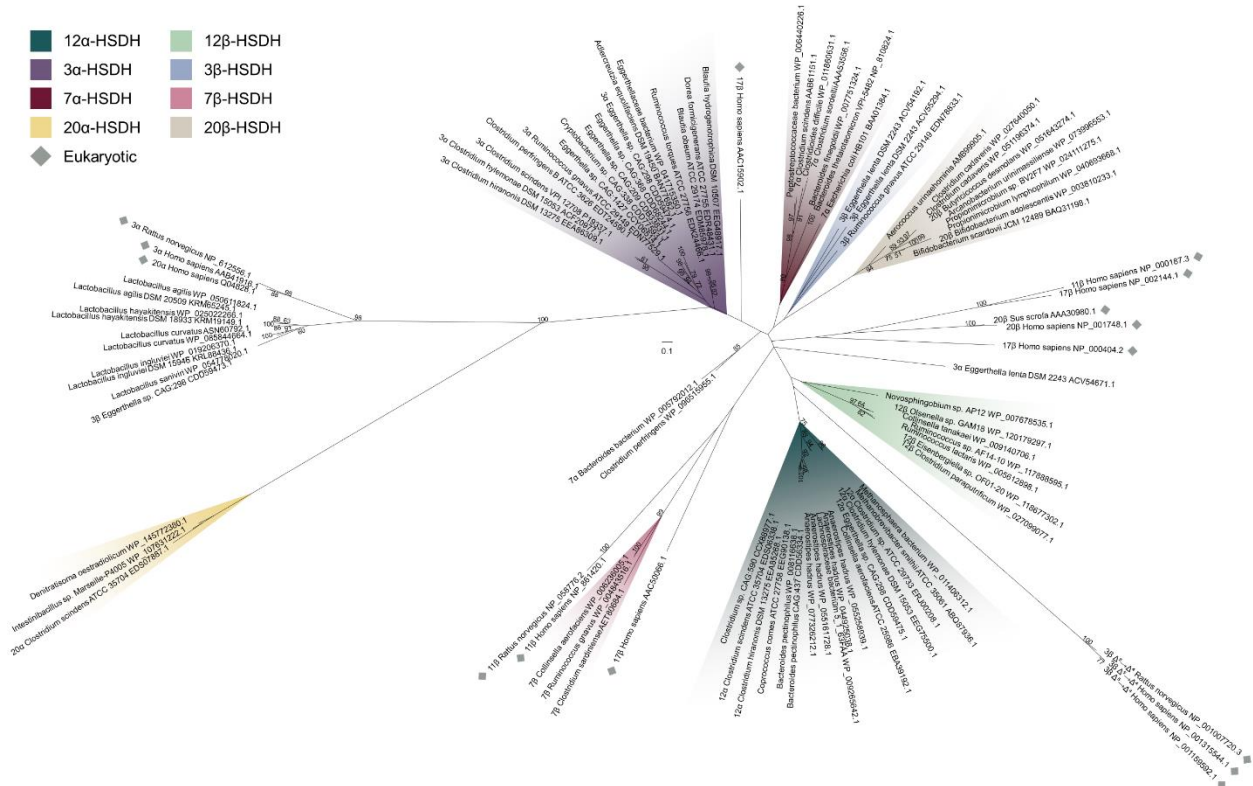

**Figure 5. Maximum-likelihood phylogenetic analysis of bacterial and eukaryotic HSDHs.**

Clusters are shaded by function or marked as eukaryotic, as displayed. Sequences with experimentally determined activities are labeled with their function followed by organism and accession number. See Table S2 for sequence information.
